# Supplementary material for: Community-based antiretroviral therapy versus standard clinic-based services for HIV in South Africa and Uganda (DO ART): a randomised trial
Source: PubMed Central journal article supplement (PMC7527697; doi:10.1016/s2214-109x(20)30313-2), 2020-09-21
Supplement: mmc1.pdf [file mmc1.pdf]

# THE LANCET

## Global Health

### Supplementary appendix

This appendix formed part of the original submission and has been peer reviewed. We post it as supplied by the authors.

Supplement to: Barnabas RV, Szpiro AA, van Rooyen H, et al. Community-based antiretroviral therapy versus standard clinic-based services for HIV in South Africa and Uganda (DO ART): a randomised trial. *Lancet Glob Health* 2020; **8**: e1305–15.

**DO ART STUDY  
SUPPLEMENTARY MATERIAL**

**TABLE OF CONTENTS**

DO ART Study Team----- 3

    Coordinating partners ----- 3

    Study sites----- 3

    Independent----- 3

Screening and Enrolment----- 4

    Figure: Participant accrual ----- 5

    Table S1: Screening and enrolment----- 5

    Table S2: Baseline characteristics: intention-to-treat----- 6

Retention ----- 7

    Table S3: Study retention by timepoint ----- 7

Endpoints----- 8

    Table S4: Sensitivity analyses of relative risks of viral suppression, overall----- 8

    Table S5: Rates and risk differences of viral suppression at exit by group, overall and among subgroups ----- 9

    Table S6: Rates and relatives risks of viral suppression at exit by group and gender----- 10

    Table S7: Severe adverse events and social harms – participant-level summary by group----- 10

Cost Analysis Details ----- 11

    Cost Estimation ----- 11

    Scenarios ----- 11

    Table S8: Estimated client volume by site for efficient at-scale scenario ----- 11

    Table S9: Estimated number of clients seen per year per under steady-state and efficient at-scale scenarios ----- 12

    Table S10: Unit costs of key inputs (2018 USD) ----- 12

    \*Obtained from study budgets ----- 12

    Annual cost per client ----- 12

    Table S11: Annual cost per client in steady-state (as observed) scenario (2018 USD) ----- 12

    Table S12: Annual cost per client in steady-state (programmatic) scenario (2018 USD) ----- 12

    Table S13: Annual cost per client in efficient at-scale scenario (2018 USD) ----- 13

    Table S14: Estimated annual costs per client and per client virally suppressed under community-based ART delivery (2018 USD)13

    Table S15: Comparison of estimated community-based (efficient at-scale scenario) vs. facility-based annual cost per client virally suppressed in South Africa and Uganda ----- 13

    Limitations----- 13

Evolving Standard of Care----- 14

    Table S16. Summary of changes in standard of care by site ----- 14

    Table S17. Standard of care description at Kabwohe Clinical Research Centre (SW Uganda)----- 14

    Table S18. Standard of care description at Caluza, Mpumuza, and Pata clinics (Midlands KZN SA) ----- 15

    Table S19. Standard of care description at Ashdown clinic (Midlands KZN SA)----- 15

    Table S20. Standard of care description at Nkundusi, Madwaleni, Ntondweni, and Zwenelisha clinics (Northern KZN SA) ----- 15

    Table S21. Standard of care description at Siphon Zungu clinic (Northern KZN SA) ----- 15

## **DO ART STUDY TEAM**

### **Coordinating partners**

University of Washington: Ruanne V. Barnabas, Connie Celum (principal investigators); Jared M. Baeten, Jennifer Baugh, Ellie Hawman, Jack Knauer, Meighan L. Krows, Rachel Johnson, Toni Maddox, Deidra Montoya, Susan Morrison, Colin Pappajohn, Kathryn Peebles, Justice Quame-Amaglo, D. Allen Roberts, Adrienne E. Shapiro, Torin T. Schaafsma, Adam Szpiro, Katherine K. Thomas

Harvard University: Norma Ware (principle investigator); Emily Pisarski, Monique Wyatt

### **Study sites**

Integrated Community Based Initiatives (Southwestern Uganda): Stephen Asiimwe, Elioda Tumwesigye (principal investigators); Silvanus Ahaisibwe, Edwin Ariguma, Paul Asiimwe, Robert Biajuka, Mackline Birungi, Obed Masiko, Benard Muhumuza, Saidi Mureme, Julius Nabasa, Alison Nagasha, Mishaki Ndebesa, Edgar Ngarame Nduho, Caroline Orishaba, Moses Tukwatsibwe, John Bosco Tumuhairwe, Aggrey Tumuhimbise, Betty Tumukunde, Bosco Turyamureeba

Human Sciences Research Council (Mid-KZN SA): Alastair van Heerden, Heidi van Rooyen (principal investigators); Nomfundo Bhengu, Mbongeleni Buthelezi, Pumla Dladla, Beauty Dlamini, Philip Joseph, Nosipho Khumalo, Nonkululeko Khuzwayo, Celokuhle Latha, Lungelo Madlala, Sanelisiwe Majola, Langelihle Makhoba, Smiso Mbambo, Mbongeni Mbanjwa, Yvonne Mdakane, Tembeka Mhlakwaphalwa, Noneka Mhlaluka, Philisiwe Mkhize, Nomusa Mntambo, Jabu Molefe, Lindani Msimango, Thulani Msomi, Zilungile Mvubu, Protus Mzolo, Nontobeko Ndebele, Sabelo Ndlovu, Nkosinathi Ngcobo, Mbongeni Ngcoya, Thulani Ngubane, Siyabonga Nkala, Jabulile Ntombela, Njabulo Ntusi, Thembelihle Pita, Nhlanhla Radebe, Nokhanya Radebe, Princess Ralenkoane, Kombi Sausi, Wonderboy Shange, Kwenzakwakhe Shezi, Sibongile Shezi, Khayelihle Zondi, Nomvula Zulu, Sindiswa Zulu, Nobuhle Zuma

Africa Health Research Institute (Northern KZN SA): Olivier Koole, Deenan Pillay, Maryam Shahmanesh (principal investigators); Oluwafemi Adeagbo, Zilethile Khumalo, Tumi Madolo, Thuli Mahlaba, Sbusiso Mdletshe, Zodwa Mkhwanazi, Lethiwe Mlambo, Mthokozisi Mnomiya, Nondumiso Mpanza, Senzo Msweli, Sanele Mthiyane, Thabani Mtshali, Xolani Ngwenya, Nokwazi Ntombela, Siyabonga Nxumalo, Vuyiswa Nyawose, Janet Seeley, Cabangeni Shange, Funani Shange, Nsika Sithole

### **Independent**

Mobenzi: Peter Fowles, Andi Friedman, Norval Geldenhuys, Lee Goodrick, Mark Katzwinkel, Elsje Kemp, Simone Leukes, Luckmore Muzarabani, Catherine Rode, Marinthea van Tonder, Ruaan Viljoen

Data and Safety Monitoring Board: Francois Venter (Chair), James P. Hughes, Sydney B. Rosen

# SCREENING AND ENROLMENT

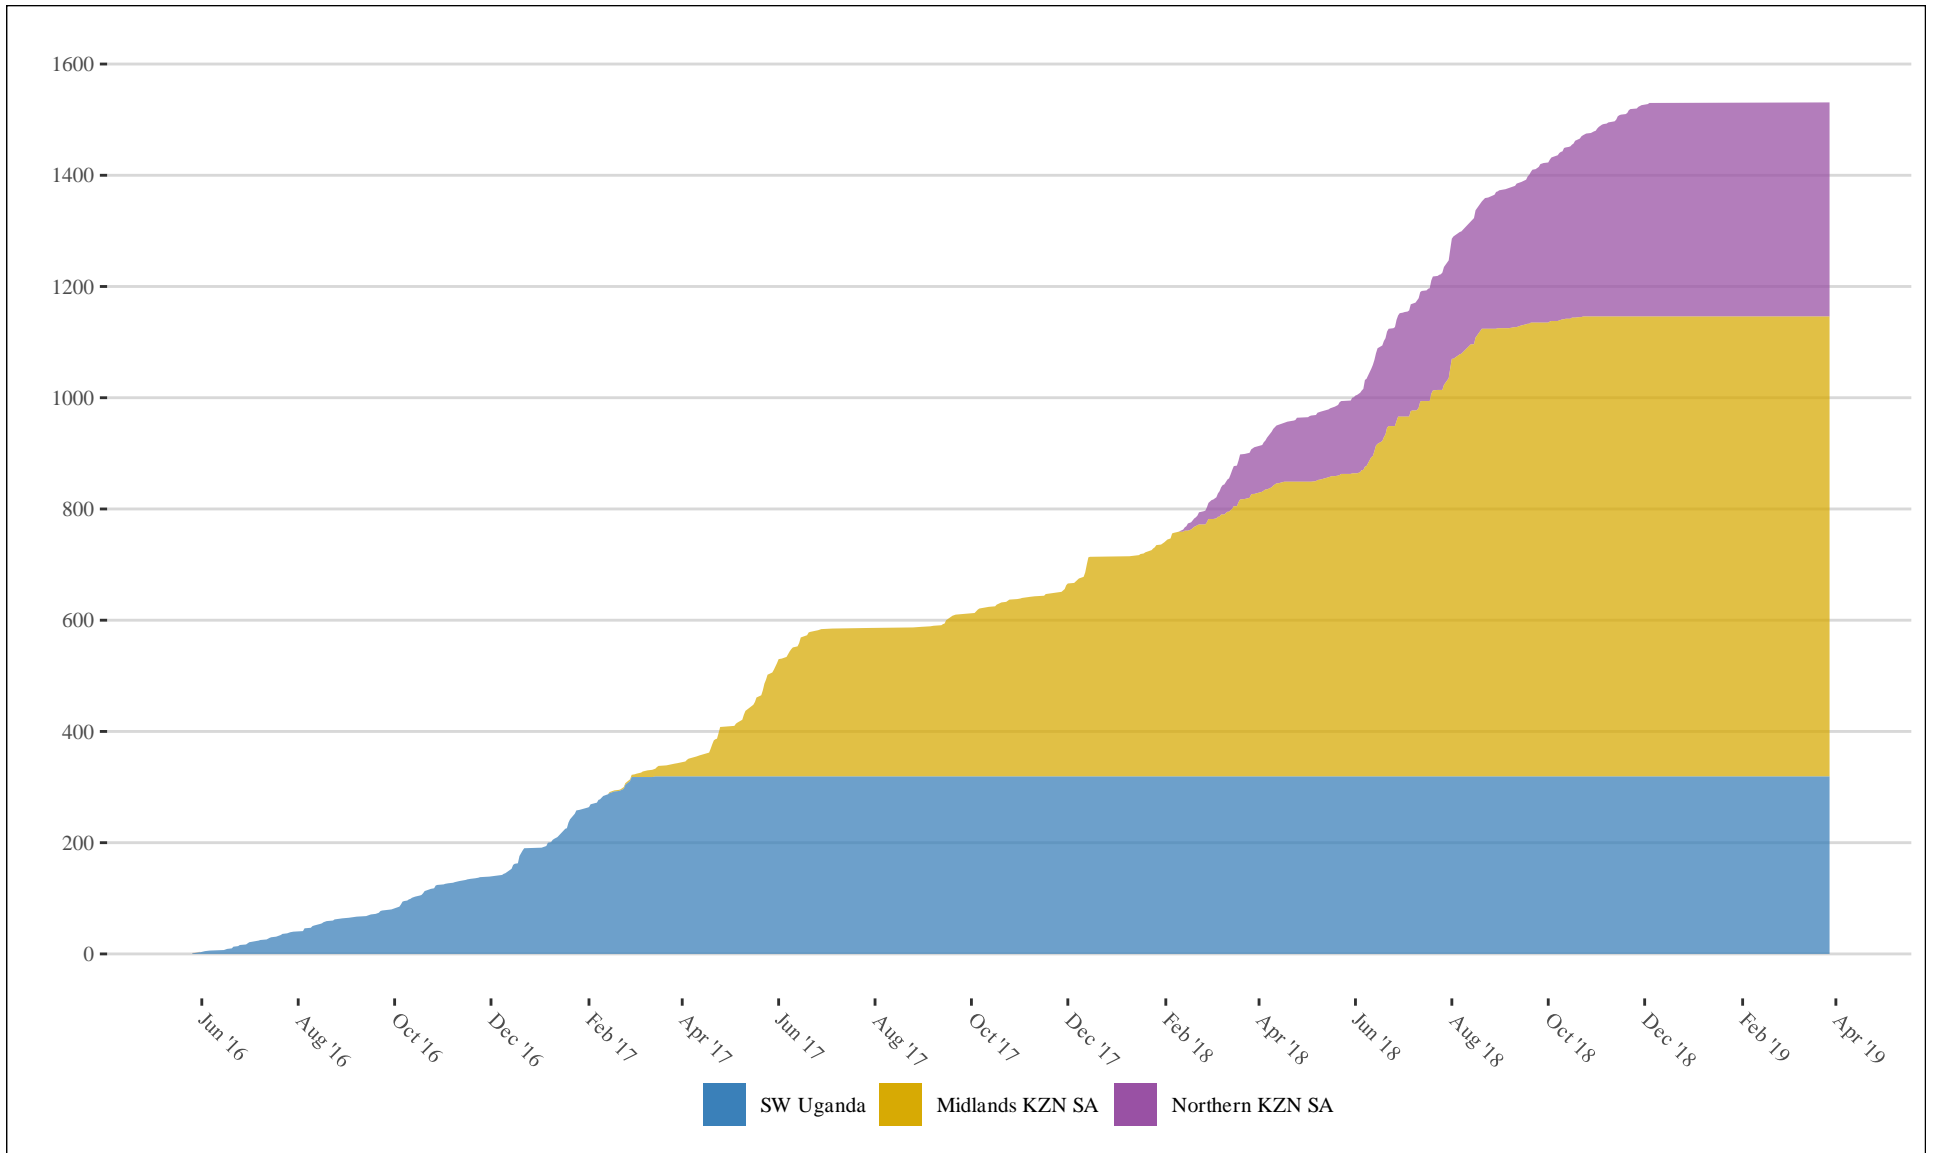

**Figure: Participant accrual**

**Table S1: Screening and enrolment**

|                                   | Total      |            |            | SW Uganda  |           |            | Midlands KZN SA |            |            | Northern KZN SA <sup>*</sup> |           |           |
|-----------------------------------|------------|------------|------------|------------|-----------|------------|-----------------|------------|------------|------------------------------|-----------|-----------|
|                                   | Total      | Male       | Female     | Total      | Male      | Female     | Total           | Male       | Female     | Total                        | Male      | Female    |
| Enumerated                        | 9094       | 4377       | 4717       | 2001       | 994       | 1007       | 6355            | 2993       | 3362       |                              |           |           |
| Tested for HIV                    | 8265 (91%) | 3957 (90%) | 4308 (91%) | 1750 (87%) | 856 (86%) | 894 (89%)  | 5967 (94%)      | 2811 (94%) | 3156 (94%) |                              |           |           |
| HIV+                              | 2479 (30%) | 1035 (26%) | 1444 (34%) | 398 (23%)  | 196 (23%) | 202 (23%)  | 1580 (26%)      | 579 (21%)  | 1001 (32%) | 501                          | 260       | 241       |
| Completed screening               | 2393 (97%) | 994 (96%)  | 1399 (97%) | 396 (99%)  | 195 (99%) | 201 (>99%) | 1510 (96%)      | 545 (94%)  | 965 (96%)  | 487 (97%)                    | 254 (98%) | 233 (97%) |
| Ineligible                        | 862 (36%)  | 286 (29%)  | 576 (41%)  | 77 (19%)   | 27 (14%)  | 50 (25%)   | 683 (45%)       | 209 (38%)  | 474 (49%)  | 102 (21%)                    | 50 (20%)  | 52 (22%)  |
| <i>On ART</i>                     | 66 (8%)    | 13 (5%)    | 53 (9%)    | 5 (6%)     | 0 (0%)    | 5 (10%)    | 58 (8%)         | 12 (6%)    | 46 (10%)   | 3 (3%)                       | 1 (2%)    | 2 (4%)    |
| <i>CD4 &lt; 100 cells/μL</i>      | 36 (4%)    | 21 (7%)    | 15 (3%)    | 13 (17%)   | 7 (26%)   | 6 (12%)    | 8 (1%)          | 2 (1%)     | 6 (1%)     | 15 (15%)                     | 12 (24%)  | 3 (6%)    |
| <i>Pregnant</i>                   | 26 (3%)    | 0 (0%)     | 26 (5%)    | 7 (9%)     | 0 (0%)    | 7 (14%)    | 18 (3%)         | 0 (0%)     | 18 (4%)    | 1 (1%)                       | 0 (0%)    | 1 (2%)    |
| <i>Creatinine &gt; 133 μmol/L</i> | 14 (2%)    | 6 (2%)     | 8 (1%)     | 3 (4%)     | 3 (11%)   | 0 (0%)     | 9 (1%)          | 2 (1%)     | 7 (1%)     | 2 (2%)                       | 1 (2%)    | 1 (2%)    |
| <i>WHO Stage 4</i>                | 3 (<1%)    | 2 (1%)     | 1 (<1%)    | 0 (0%)     | 0 (0%)    | 0 (0%)     | 1 (<1%)         | 1 (<1%)    | 0 (0%)     | 2 (2%)                       | 1 (2%)    | 1 (2%)    |
| <i>On active TB Tx</i>            | 6 (1%)     | 3 (1%)     | 3 (1%)     | 0 (0%)     | 0 (0%)    | 0 (0%)     | 6 (1%)          | 3 (1%)     | 3 (1%)     | 0 (0%)                       | 0 (0%)    | 0 (0%)    |
| <i>Any TB symptoms</i>            | 76 (9%)    | 24 (8%)    | 52 (9%)    | 9 (12%)    | 3 (11%)   | 6 (12%)    | 67 (10%)        | 21 (10%)   | 46 (10%)   | 0 (0%)                       | 0 (0%)    | 0 (0%)    |
| <i>Other clinical criteria</i>    | 1 (<1%)    | 1 (<1%)    | 0 (0%)     | 0 (0%)     | 0 (0%)    | 0 (0%)     | 1 (<1%)         | 1 (<1%)    | 0 (0%)     | 0 (0%)                       | 0 (0%)    | 0 (0%)    |
| <i>CD4 &gt; 500 cells/μL</i>      | 36 (4%)    | 12 (4%)    | 24 (4%)    | 36 (47%)   | 12 (44%)  | 24 (48%)   | 0 (0%)          | 0 (0%)     | 0 (0%)     | 0 (0%)                       | 0 (0%)    | 0 (0%)    |
| <i>Virally suppressed</i>         | 588 (68%)  | 199 (70%)  | 389 (68%)  | 0 (0%)     | 0 (0%)    | 0 (0%)     | 510 (75%)       | 165 (79%)  | 345 (73%)  | 78 (76%)                     | 34 (68%)  | 44 (85%)  |
| <i>Refused ART</i>                | 6 (1%)     | 4 (1%)     | 2 (<1%)    | 3 (4%)     | 2 (7%)    | 1 (2%)     | 2 (<1%)         | 1 (<1%)    | 1 (<1%)    | 1 (1%)                       | 1 (2%)    | 0 (0%)    |
| <i>Did not consent</i>            | 4 (<1%)    | 1 (<1%)    | 3 (1%)     | 1 (1%)     | 0 (0%)    | 1 (2%)     | 3 (<1%)         | 1 (<1%)    | 2 (<1%)    | 0 (0%)                       | 0 (0%)    | 0 (0%)    |
| Enrolled                          | 1531 (64%) | 708 (71%)  | 823 (59%)  | 319 (81%)  | 168 (86%) | 151 (75%)  | 827 (55%)       | 336 (62%)  | 491 (51%)  | 385 (79%)                    | 204 (80%) | 181 (78%) |
| <i>Clinic group</i>               | 514 (34%)  | 243 (34%)  | 271 (33%)  | 99 (31%)   | 51 (30%)  | 48 (32%)   | 269 (33%)       | 114 (34%)  | 155 (32%)  | 146 (38%)                    | 78 (38%)  | 68 (38%)  |
| <i>Hybrid group</i>               | 509 (33%)  | 232 (33%)  | 277 (34%)  | 111 (35%)  | 59 (35%)  | 52 (34%)   | 275 (33%)       | 109 (32%)  | 166 (34%)  | 123 (32%)                    | 64 (31%)  | 59 (33%)  |
| <i>Community group</i>            | 508 (33%)  | 233 (33%)  | 275 (33%)  | 109 (34%)  | 58 (35%)  | 51 (34%)   | 283 (34%)       | 113 (34%)  | 170 (35%)  | 116 (30%)                    | 62 (30%)  | 54 (30%)  |

<sup>\*</sup> Northern KZN SA did extensive pre-screening so the numbers enumerated and tested for HIV are not knowns  
KZN SA = KwaZulu-Natal, South Africa

**Table S2: Baseline characteristics: intention-to-treat**

|                                |             | <b>Total</b>      |       | <b>Clinic group</b> |       | <b>Hybrid group</b> |       | <b>Community group</b> |       |
|--------------------------------|-------------|-------------------|-------|---------------------|-------|---------------------|-------|------------------------|-------|
|                                |             | <b>(n = 1531)</b> |       | <b>(n = 514)</b>    |       | <b>(n = 509)</b>    |       | <b>(n = 508)</b>       |       |
| Gender                         | Male        | 708               | (46%) | 168                 | (53%) | 336                 | (41%) | 204                    | (53%) |
|                                | Female      | 823               | (54%) | 151                 | (47%) | 491                 | (59%) | 181                    | (47%) |
| Age                            | 18 - 29     | 551               | (36%) | 121                 | (38%) | 276                 | (33%) | 154                    | (40%) |
|                                | 30 - 49     | 858               | (56%) | 162                 | (51%) | 493                 | (60%) | 203                    | (53%) |
|                                | > 49        | 122               | (8%)  | 36                  | (11%) | 58                  | (7%)  | 28                     | (7%)  |
| Education                      | Primary     | 441/1497          | (29%) | 214/304             | (70%) | 128/817             | (16%) | 99/376                 | (26%) |
|                                | Secondary   | 1010/1497         | (67%) | 75/304              | (25%) | 662/817             | (81%) | 273/376                | (73%) |
|                                | Tertiary    | 46/1497           | (3%)  | 15/304              | (5%)  | 27/817              | (3%)  | 4/376                  | (1%)  |
| Employed                       |             | 594               | (39%) | 193                 | (38%) | 204                 | (40%) | 197                    | (39%) |
| Study household size           | 1           | 1462              | (95%) | 489                 | (95%) | 491                 | (96%) | 482                    | (95%) |
|                                | 2           | 66                | (4%)  | 22                  | (4%)  | 18                  | (4%)  | 26                     | (5%)  |
|                                | 3           | 3                 | (<1%) | 3                   | (1%)  | 0                   | (0%)  | 0                      | (0%)  |
| In relationship                |             | 982               | (64%) | 318                 | (62%) | 330                 | (65%) | 334                    | (66%) |
| Number of current sex partners | 0           | 140/1521          | (9%)  | 46/508              | (9%)  | 51/506              | (10%) | 43/507                 | (8%)  |
|                                | 1           | 1166/1521         | (77%) | 387/508             | (76%) | 384/506             | (76%) | 395/507                | (78%) |
|                                | ≥ 2         | 215/1521          | (14%) | 75/508              | (15%) | 71/506              | (14%) | 69/507                 | (14%) |
| Condom used at last sex        |             | 350/1506          | (23%) | 125/503             | (25%) | 107/500             | (21%) | 118/503                | (23%) |
| Circumcised                    |             | 153/708           | (22%) | 56/243              | (23%) | 47/232              | (20%) | 50/233                 | (21%) |
| Knows of nearby HIV clinic     |             | 1498/1530         | (98%) | 503                 | (98%) | 502/508             | (99%) | 493                    | (97%) |
| WHO stage                      | Stage 1     | 1389              | (91%) | 462                 | (90%) | 465                 | (91%) | 462                    | (91%) |
|                                | Stage 2     | 118               | (8%)  | 40                  | (8%)  | 37                  | (7%)  | 41                     | (8%)  |
|                                | Stage 3     | 24                | (2%)  | 12                  | (2%)  | 7                   | (1%)  | 5                      | (1%)  |
| CD4 count (cells/μL)           | 100 - 349   | 473               | (31%) | 155                 | (30%) | 151                 | (30%) | 167                    | (33%) |
|                                | 350 - 499   | 370               | (24%) | 123                 | (24%) | 116                 | (23%) | 131                    | (26%) |
|                                | ≥ 500       | 688               | (45%) | 236                 | (46%) | 242                 | (48%) | 210                    | (41%) |
| Creatinine (μmol/L)            | < 106       | 1452              | (95%) | 485                 | (94%) | 482                 | (95%) | 485                    | (95%) |
|                                | 106 - 133   | 79                | (5%)  | 29                  | (6%)  | 27                  | (5%)  | 23                     | (5%)  |
| DBS viral load (copies/mL)     | < 20        | 216/1420          | (15%) | 68/472              | (14%) | 67/471              | (14%) | 81/477                 | (17%) |
|                                | 20 - 999    | 264/1420          | (19%) | 89/472              | (19%) | 96/471              | (20%) | 79/477                 | (17%) |
|                                | 1000 - 9999 | 476/1420          | (34%) | 156/472             | (33%) | 145/471             | (31%) | 175/477                | (37%) |
|                                | ≥ 10000     | 464/1420          | (33%) | 159/472             | (34%) | 163/471             | (35%) | 142/477                | (30%) |

## RETENTION

**Table S3: Study retention by timepoint**

|                        | Enrolled | Month 1 |       | Month 3 |       | Month 6   |       | Month 9   |       | Exit <sup>†</sup> |       |
|------------------------|----------|---------|-------|---------|-------|-----------|-------|-----------|-------|-------------------|-------|
|                        | n        | n       | (%)   | n       | (%)   | n         | (%)   | n         | (%)   | n                 | (%)   |
| <b>Total</b>           | 1531     | 1270    | (83%) | 1262    | (82%) | 1237/1504 | (82%) | 1120/1377 | (81%) | 1466              | (96%) |
| Clinic group           | 514      | 396     | (77%) | 405     | (79%) | 414/503   | (82%) | 397/465   | (85%) | 494               | (96%) |
| Hybrid group           | 509      | 420     | (83%) | 405     | (80%) | 388/502   | (77%) | 351/458   | (77%) | 478               | (94%) |
| Community group        | 508      | 454     | (89%) | 452     | (89%) | 435/499   | (87%) | 372/454   | (82%) | 494               | (97%) |
| <b>SW Uganda</b>       | 319      | 305     | (96%) | 297     | (93%) | 263/292   | (90%) | 125/165   | (76%) | 287               | (90%) |
| Clinic group           | 99       | 98      | (99%) | 94      | (95%) | 82/88     | (93%) | 39/50     | (78%) | 87                | (88%) |
| Hybrid group           | 111      | 100     | (90%) | 97      | (87%) | 89/104    | (86%) | 42/60     | (70%) | 96                | (86%) |
| Community group        | 109      | 107     | (98%) | 106     | (97%) | 92/100    | (92%) | 44/55     | (80%) | 104               | (95%) |
| <b>Midlands KZN SA</b> | 827      | 651     | (79%) | 648     | (78%) | 667       | (81%) | 676       | (82%) | 810               | (98%) |
| Clinic group           | 269      | 203     | (75%) | 211     | (78%) | 223       | (83%) | 235       | (87%) | 265               | (99%) |
| Hybrid group           | 275      | 211     | (77%) | 198     | (72%) | 200       | (73%) | 209       | (76%) | 266               | (97%) |
| Community group        | 283      | 237     | (84%) | 239     | (84%) | 244       | (86%) | 232       | (82%) | 279               | (99%) |
| <b>Northern KZN SA</b> | 385      | 314     | (82%) | 317     | (82%) | 307       | (80%) | 319       | (83%) | 369               | (96%) |
| Clinic group           | 146      | 95      | (65%) | 100     | (68%) | 109       | (75%) | 123       | (84%) | 142               | (97%) |
| Hybrid group           | 123      | 109     | (89%) | 110     | (89%) | 99        | (80%) | 100       | (81%) | 116               | (94%) |
| Community group        | 116      | 110     | (95%) | 107     | (92%) | 99        | (85%) | 96        | (83%) | 111               | (96%) |

<sup>†</sup> Includes six participants who did not attend an exit visit but contributed a viral load endpoint via chart abstraction

KZN SA = KwaZulu-Natal, South Africa



## ENDPOINTS

**Table S4: Sensitivity analyses of relative risks of viral suppression, overall**

|                                                                                                                                      | Rate of Viral Suppression |         |       |              |         |       |                 |         |       | Adjusted* Relative Risk of Viral Suppression |               |                              |                                    |               |         |
|--------------------------------------------------------------------------------------------------------------------------------------|---------------------------|---------|-------|--------------|---------|-------|-----------------|---------|-------|----------------------------------------------|---------------|------------------------------|------------------------------------|---------------|---------|
|                                                                                                                                      | Clinic group              |         |       | Hybrid group |         |       | Community group |         |       | Hybrid group vs<br>Clinic group              |               |                              | Community group vs<br>Clinic group |               |         |
|                                                                                                                                      | N                         | n       | (%)   | N            | n       | (%)   | N               | n       | (%)   | RR                                           | (95% CI)      | p value                      | RR                                 | (95% CI)      | p value |
| <b>mITT (Primary analysis):</b><br>- excluding suppressed at baseline<br>- excluding lost-to-follow-up                               | 446                       | 269/426 | (63%) | 442          | 282/413 | (68%) | 427             | 306/414 | (74%) | 1.08                                         | (0.98 - 1.19) | 0.12<br>0.0049 <sup>†</sup>  | 1.18                               | (1.07 - 1.29) | 0.00053 |
| <b>mITT unadjusted:</b><br>- primary model without covariates                                                                        | 446                       | 269/426 | (63%) | 442          | 282/413 | (68%) | 427             | 306/414 | (74%) | 1.08                                         | (0.98 - 1.19) | 0.12<br>0.0049 <sup>†</sup>  | 1.17                               | (1.07 - 1.28) | 0.00090 |
| <b>mITT time adjusted:</b><br>- primary model also adjusted for calendar time<br>(using cubic splines stratified by site, 6 df/year) | 446                       | 269/426 | (63%) | 442          | 282/413 | (68%) | 427             | 306/414 | (74%) | 1.10                                         | (1.00 - 1.21) | 0.057<br>0.0016 <sup>†</sup> | 1.19                               | (1.09 - 1.31) | 0.00014 |
| <b>mITT WHO cut-off:</b><br>- suppression cut-off of < 1000 copies/mL                                                                | 446                       | 309/426 | (73%) | 442          | 317/413 | (77%) | 427             | 348/414 | (84%) | 1.05                                         | (0.98 - 1.14) | 0.18<br>0.0041 <sup>†</sup>  | 1.16                               | (1.08 - 1.25) | <0.0001 |
| <b>mITT lost-to-follow-up:</b><br>- excluding suppressed at baseline<br>- assuming lost-to-follow-up detectable                      | 446                       | 269/446 | (60%) | 442          | 282/442 | (64%) | 427             | 306/427 | (72%) | 1.06                                         | (0.95 - 1.17) | 0.30<br>0.022 <sup>†</sup>   | 1.20                               | (1.09 - 1.32) | 0.00024 |
| <b>ITT:</b><br>- including suppressed at baseline<br>- excluding lost-to-follow-up                                                   | 514                       | 322/494 | (65%) | 509          | 329/475 | (69%) | 508             | 366/491 | (75%) | 1.06                                         | (0.98 - 1.16) | 0.16<br>0.0054 <sup>†</sup>  | 1.15                               | (1.06 - 1.25) | 0.00099 |
| <b>ITT lost-to-follow-up as detectable:</b><br>- including suppressed at baseline<br>- assuming lost-to-follow-up detectable         | 514                       | 322/514 | (63%) | 509          | 329/509 | (65%) | 508             | 366/508 | (72%) | 1.03                                         | (0.94 - 1.13) | 0.50<br>0.039 <sup>†</sup>   | 1.16                               | (1.06 - 1.26) | 0.00087 |

\* Adjusted for gender, age less than 30, baseline CD4 count (WHO category), and study site

<sup>†</sup> p value for a one-sided Wald test for non-inferiority (RR > 0.95)

**Table S5: Rates and risk differences of viral suppression at exit by group, overall and among subgroups**

|                     | Rate of Viral Suppression |         |       |              |         |       | Adjusted* Risk Difference of Viral Suppression |         |       |                              |                |         |                                 |               |         |
|---------------------|---------------------------|---------|-------|--------------|---------|-------|------------------------------------------------|---------|-------|------------------------------|----------------|---------|---------------------------------|---------------|---------|
|                     | Clinic group              |         |       | Hybrid group |         |       | Community group                                |         |       | Hybrid group vs Clinic group |                |         | Community group vs Clinic group |               |         |
|                     | N                         | n       | (%)   | N            | n       | (%)   | N                                              | n       | (%)   | RD                           | (95% CI)       | p value | RD                              | (95% CI)      | p value |
| <b>OVERALL</b>      | 446                       | 269/426 | (63%) | 442          | 282/413 | (68%) | 427                                            | 306/414 | (74%) | 4.9                          | (-1.4 - 11.2)  | 0.13    | 11.0                            | (4.8 - 17.1)  | 0.00048 |
| <b>Gender</b>       |                           |         |       |              |         |       |                                                |         |       |                              | 0.044‡         |         |                                 | 0.011‡        |         |
| Male                | 230                       | 120/221 | (54%) | 217          | 134/203 | (66%) | 219                                            | 156/213 | (73%) | 10.5                         | (1.2 - 19.8)   |         | 18.4                            | (9.5 - 27.2)  |         |
| Female              | 216                       | 149/205 | (73%) | 225          | 148/210 | (70%) | 208                                            | 150/201 | (75%) | -1.5                         | (-10.1 - 7.1)  |         | 2.9                             | (-5.6 - 11.3) |         |
| <b>Age</b>          |                           |         |       |              |         |       |                                                |         |       |                              | 0.90‡          |         |                                 | 0.58‡         |         |
| 18-29               | 150                       | 98/144  | (68%) | 179          | 114/160 | (71%) | 158                                            | 116/154 | (75%) | 4.7                          | (-5.6 - 15.0)  |         | 9.1                             | (-1.2 - 19.4) |         |
| 30+                 | 296                       | 171/282 | (61%) | 263          | 168/253 | (66%) | 269                                            | 190/260 | (73%) | 5.0                          | (-3.0 - 13.1)  |         | 12.3                            | (4.5 - 20.0)  |         |
| <b>Site</b>         |                           |         |       |              |         |       |                                                |         |       |                              | 0.22‡          |         |                                 | 0.16‡         |         |
| SW Uganda           | 96                        | 64/84   | (76%) | 108          | 66/91   | (73%) | 101                                            | 74/94   | (79%) | -2.3                         | (-15.4 - 10.8) |         | 4.1                             | (-8.3 - 16.6) |         |
| Midlands KZN SA     | 217                       | 125/213 | (59%) | 221          | 137/216 | (63%) | 222                                            | 151/220 | (69%) | 4.4                          | (-4.7 - 13.5)  |         | 9.8                             | (0.9 - 18.8)  |         |
| Northern KZN SA     | 133                       | 80/129  | (62%) | 113          | 79/106  | (75%) | 104                                            | 81/100  | (81%) | 12.0                         | (0.5 - 23.6)   |         | 19.2                            | (7.9 - 30.6)  |         |
| <b>SOUTH AFRICA</b> | 350                       | 205/342 | (60%) | 334          | 216/322 | (67%) | 326                                            | 232/320 | (72%) | 7.0                          | (-0.2 - 14.2)  | 0.056   | 12.9                            | (5.9 - 20.0)  | 0.00032 |
| <b>Gender</b>       |                           |         |       |              |         |       |                                                |         |       |                              | 0.048‡         |         |                                 | 0.025‡        |         |
| Male                | 181                       | 91/178  | (51%) | 161          | 100/153 | (65%) | 163                                            | 113/158 | (72%) | 13.1                         | (2.5 - 23.7)   |         | 20.1                            | (10.0 - 30.3) |         |
| Female              | 169                       | 114/164 | (70%) | 173          | 116/169 | (69%) | 163                                            | 119/162 | (73%) | -0.3                         | (-10.2 - 9.5)  |         | 4.7                             | (-5.0 - 14.5) |         |

\* Adjusted for gender, age less than 30, baseline CD4 count (WHO category), and study site

‡ p value for a Wald test for significant interaction

KZN SA = KwaZulu-Natal, South Africa

**Table S6: Rates and relatives risks of viral suppression at exit by group and gender**

|                        | Rate of Viral Suppression |         |       |              |         |       |                 |         |       | Adjusted <sup>†</sup> Relative Risk of Viral Suppression |               |                    |                                 |               |                    |
|------------------------|---------------------------|---------|-------|--------------|---------|-------|-----------------|---------|-------|----------------------------------------------------------|---------------|--------------------|---------------------------------|---------------|--------------------|
|                        | Clinic group              |         |       | Hybrid group |         |       | Community group |         |       | Hybrid group vs Clinic group                             |               |                    | Community group vs Clinic group |               |                    |
|                        | N                         | n       | (%)   | N            | n       | (%)   | N               | n       | (%)   | RR                                                       | (95% CI)      | p value            | RR                              | (95% CI)      | p value            |
| <b>SW Uganda</b>       | 96                        | 64/84   | (76%) | 108          | 66/91   | (73%) | 101             | 74/94   | (79%) | 0.97                                                     | (0.81 - 1.16) | 0.73               | 1.06                            | (0.90 - 1.24) | 0.51               |
| <b>Gender</b>          |                           |         |       |              |         |       |                 |         |       |                                                          |               |                    |                                 |               |                    |
| Male                   | 49                        | 29/43   | (67%) | 56           | 34/50   | (68%) | 56              | 43/55   | (78%) | 1.00                                                     | (0.75 - 1.34) | 0.41 <sup>†</sup>  | 1.16                            | (0.90 - 1.50) | 0.10 <sup>†</sup>  |
| Female                 | 47                        | 35/41   | (85%) | 52           | 32/41   | (78%) | 45              | 31/39   | (79%) | 0.97                                                     | (0.79 - 1.18) | 0.55 <sup>‡</sup>  | 0.95                            | (0.78 - 1.15) | 0.17 <sup>‡</sup>  |
| <b>Midlands KZN SA</b> | 217                       | 125/213 | (59%) | 221          | 137/216 | (63%) | 222             | 151/220 | (69%) | 1.08                                                     | (0.93 - 1.25) | 0.34               | 1.17                            | (1.01 - 1.35) | 0.034              |
| <b>Gender</b>          |                           |         |       |              |         |       |                 |         |       |                                                          |               |                    |                                 |               |                    |
| Male                   | 108                       | 53/106  | (50%) | 101          | 65/99   | (66%) | 106             | 71/105  | (68%) | 1.29                                                     | (1.02 - 1.64) | 0.053 <sup>†</sup> | 1.34                            | (1.06 - 1.69) | 0.074 <sup>‡</sup> |
| Female                 | 109                       | 72/107  | (67%) | 120          | 72/117  | (62%) | 116             | 80/115  | (70%) | 0.92                                                     | (0.76 - 1.12) | 0.024 <sup>‡</sup> | 1.04                            | (0.87 - 1.24) | 0.074 <sup>‡</sup> |
| <b>Northern KZN SA</b> | 133                       | 80/129  | (62%) | 113          | 79/106  | (75%) | 104             | 81/100  | (81%) | 1.20                                                     | (1.01 - 1.42) | 0.041              | 1.31                            | (1.11 - 1.55) | 0.0012             |
| <b>Gender</b>          |                           |         |       |              |         |       |                 |         |       |                                                          |               |                    |                                 |               |                    |
| Male                   | 73                        | 38/72   | (53%) | 60           | 35/54   | (65%) | 57              | 42/53   | (79%) | 1.17                                                     | (0.87 - 1.58) | 0.74 <sup>‡</sup>  | 1.52                            | (1.17 - 1.97) | 0.11 <sup>‡</sup>  |
| Female                 | 60                        | 42/57   | (74%) | 53           | 44/52   | (85%) | 47              | 39/47   | (83%) | 1.17                                                     | (0.96 - 1.42) | 0.74 <sup>‡</sup>  | 1.14                            | (0.93 - 1.39) | 0.11 <sup>‡</sup>  |

\* Adjusted for gender, age less than 30, baseline CD4 count (WHO category), and study site

<sup>†</sup> p value for a one-sided Wald test for non-inferiority (RR > 0.95). The relative non-inferiority margin is represented by a dashed line in the forest plot.

<sup>‡</sup> p value for a Wald test for significant interaction

**Table S7: Severe adverse events and social harms – participant-level summary by group**

|                        | Total      |         | Clinic group |         | Hybrid group |         | Community group |         |
|------------------------|------------|---------|--------------|---------|--------------|---------|-----------------|---------|
|                        | (n = 1531) |         | (n = 514)    |         | (n = 509)    |         | (n = 508)       |         |
| Serious adverse events | 20         | (1.31%) | 8            | (1.56%) | 5            | (0.98%) | 7               | (1.38%) |
| Grade 5                | 9          | (0.59%) | 4            | (0.78%) | 2            | (0.39%) | 3               | (0.59%) |
| Grade 4                | 1          | (0.07%) | 1            | (0.19%) | 0            | (0.00%) | 0               | (0.00%) |
| Grade 3                | 9          | (0.59%) | 3            | (0.58%) | 2            | (0.39%) | 4               | (0.79%) |
| Grade 2                | 1          | (0.07%) | 0            | (0.00%) | 1            | (0.20%) | 0               | (0.00%) |
| Severe adverse events  | 13         | (0.85%) | 2            | (0.39%) | 4            | (0.79%) | 7               | (1.38%) |
| Grade 3                | 13         | (0.85%) | 2            | (0.39%) | 4            | (0.79%) | 7               | (1.38%) |
| Social harms           | 2          | (0.13%) | 0            | (0.00%) | 0            | (0.00%) | 2               | (0.39%) |

## COST ANALYSIS DETAILS

### Cost Estimation

We estimated the annual per-client cost of community-based ART care from the provider's perspective. We report separate cost estimates for the first year of ART (including initiation and follow-up visits at 1, 3, 6, and 9 months) and additional years of ART (consisting of four three-month follow-up visits). Costs include all activities supporting ART initiation and follow-up; we excluded outreach HIV testing costs and research-specific procedures.

Community ART delivery was implemented differently at each site. At ICOBI in southwest Uganda, field workers generally travelled to visit sites by motorcycle, which allowed easier access to rural sites, or by pickup truck with a dedicated driver. In South Africa, field workers were organized into teams of two or three individuals traveling by pickup truck or panel van. Each team included a nurse trained in ART initiation and management, an assistant, and occasionally a separate driver. We used field observation, interviews, time-motion studies, and standardized logs to measure resources consumed by each field team while implementing community ART delivery.

We categorized costs as either fixed (constant over the course of one year) or variable (directly related to the number of client encounters). We obtained drug prices from international reference price lists for Uganda and the South Africa Department of Health procurement catalogue for South Africa.<sup>1-3</sup> Laboratory monitoring costs included point-of-care CD4 testing at initiation, annual creatinine testing, and semi-annual viral load testing. We estimated fuel costs using mileage from vehicle trip logs and local fuel prices. Fixed costs were categorized as start-up, equipment, building, and personnel costs. Start-up costs included personnel, venue, and material costs incurred during hiring, training, and community mobilization. Equipment included vehicles and maintenance, PIMA CD4 analysers, furniture, uniforms, and computers. Vehicles for ART delivery included motorcycles (Uganda), pickup trucks (all sites), and modified panel vans (South Africa). We assumed a useful life of five years for motorcycles and ten years for trucks and vans. We annualized start-up, vehicle, and equipment costs over the expected useful life using a discount rate of 3%.<sup>4</sup> We estimated building and utilities costs using a rental rate derived from nearby commercial properties. Personnel salaries were derived from study budgets and included both clinical and administrative staff. We allocated administrative staff salaries based on the fraction of full-time equivalents spent supporting ART delivery (ascertained through interviews). We converted all costs to US dollars using the average local exchange rate over the relevant year and adjusted all to 2018 USD using GDP deflators.<sup>5</sup>

### Scenarios

The total number of clients in the DO ART Study was determined by statistical considerations for the primary endpoint rather than program capacity, and research salaries may not reflect personnel costs in programmatic settings. As such, we estimated cost per client by varying these assumptions in three scenarios. In the first scenario (steady-state, as observed), we used costs as observed in the study but assumed that the maximum client volume achieved during the DO ART Study was sustained for 12 months. In the second scenario (steady-state, programmatic), we used the steady-state client volume but substituted salaries paid under the research study with representative salaries derived from Ministry of Health salary scales. This scenario may more closely reflect personnel costs under local implementation. In the third scenario (efficient at-scale), we used time-motion studies to estimate the average duration of client encounters conducted by field teams at each site during peak client volume during the study. We then calculated the maximum number of clients that could be seen in an eight-hour workday after removing travel, administrative, and break time. We estimated the total number of clients that could be seen in 12 months assuming that the maximum number of encounters was achieved each day (Table S8 and Table S9). This scenario assumes no intervening travel time between client encounters and is intended to represent a mobile unit servicing one community location per day and operating at full capacity.

**Table S8: Estimated client volume by site for efficient at-scale scenario**

|                                     | SW<br>Uganda | Midlands<br>KZN SA | Northern<br>KZN SA |
|-------------------------------------|--------------|--------------------|--------------------|
| Average time per visit (hours)      | 0.84         | 0.5                | 0.6                |
| Number of visits per day per team   | 6.8          | 13.1               | 10.5               |
| Number of clients per year per team | 328          | 629                | 505                |
| Number of teams*                    | 5            | 3                  | 3                  |
| Number of clients per year          | 1638         | 1887               | 1514               |

\*As observed during peak client volume  
KZN SA = KwaZulu-Natal, South Africa

**Table S9: Estimated number of clients seen per year per under steady-state and efficient at-scale scenarios**

|              | SW<br>Uganda | Midlands<br>KZN SA | Northern<br>KZN SA |
|--------------|--------------|--------------------|--------------------|
| Steady State | 218          | 714                | 720                |
| Efficient    | 1638         | 1887               | 1541               |

**Table S10: Unit costs of key inputs (2018 USD)**

|                                          | SW Uganda        | Midlands<br>KZN SA | Northern<br>KZN SA |
|------------------------------------------|------------------|--------------------|--------------------|
| ART (per year)                           | 102 <sup>1</sup> | 114 <sup>2</sup>   | 114 <sup>2</sup>   |
| Trimethoprim/sulfamethoxazole (per year) | 8.0 <sup>3</sup> | 4.19 <sup>2</sup>  | 4.19 <sup>2</sup>  |
| Viral load (per test)                    | 20.18*           | 26.02*             | 26.02*             |
| CD4 cartridge (per test)                 | 8.69*            | 6.81*              | 6.84*              |
| Creatinine (per test)                    | 1.52*            | 7.96*              | 7.96*              |
| HIV (per test)                           | 0.87*            | 0.55*              | 0.74*              |
| Fuel (average cost per visit)            | 3.35*            | 0.87*              | 0.73*              |
| Nurse (salary per month – research)      | 2500*            | 1446*              | 2866*              |
| Nurse (salary per month – MOH)           | 264 <sup>4</sup> | 2064 <sup>5</sup>  | 2027 <sup>5</sup>  |

<sup>1</sup>Obtained from study budgets

### Annual cost per client

Using the estimated costs and volumes described above, we calculated the annual cost per client at each site for each scenario (Table S10-S12). We divided these costs by the proportion suppressed at 12 months observed in the study to estimate the cost per client virally suppressed (Table S13). The cost per client virally suppressed for subsequent years of ART assume that the proportion suppressed is constant.

**Table S11: Annual cost per client in steady-state (as observed) scenario (2018 USD)**

|                       |           | First Year   |               |                    |               |                    |               | Subsequent Years |               |                    |               |                    |               |
|-----------------------|-----------|--------------|---------------|--------------------|---------------|--------------------|---------------|------------------|---------------|--------------------|---------------|--------------------|---------------|
|                       |           | SW<br>Uganda |               | Midlands<br>KZN SA |               | Northern<br>KZN SA |               | SW<br>Uganda     |               | Midlands<br>KZN SA |               | Northern<br>KZN SA |               |
|                       |           | Cost         | (%)           | Cost               | (%)           | Cost               | (%)           | Cost             | (%)           | Cost               | (%)           | Cost               | (%)           |
| Variable              | Drugs*    | 110          | (7%)          | 118                | (19%)         | 118                | (21%)         | 110              | (9%)          | 118                | (23%)         | 118                | (26%)         |
|                       | Labs      | 36           | (2%)          | 60                 | (9%)          | 60                 | (10%)         | 22               | (2%)          | 34                 | (7%)          | 34                 | (7%)          |
|                       | Fuel      | 17           | (1%)          | 4                  | (1%)          | 4                  | (1%)          | 13               | (1%)          | 3                  | (1%)          | 2                  | (<1%)         |
|                       | Other     | 2            | (<1%)         | 1                  | (<1%)         | 1                  | (<1%)         | 2                | (<1%)         | 1                  | (<1%)         | 1                  | (<1%)         |
| <b>Variable Total</b> |           | <b>165</b>   | <b>(11%)</b>  | <b>183</b>         | <b>(29%)</b>  | <b>183</b>         | <b>(32%)</b>  | <b>148</b>       | <b>(12%)</b>  | <b>156</b>         | <b>(30%)</b>  | <b>156</b>         | <b>(34%)</b>  |
| Fixed                 | Personnel | 1142         | (73%)         | 377                | (59%)         | 319                | (56%)         | 913              | (74%)         | 302                | (58%)         | 256                | (55%)         |
|                       | Vehicles  | 83           | (5%)          | 24                 | (4%)          | 25                 | (4%)          | 66               | (5%)          | 19                 | (4%)          | 20                 | (4%)          |
|                       | Equipment | 38           | (2%)          | 5                  | (1%)          | 8                  | (1%)          | 5                | (<1%)         | 1                  | (<1%)         | 1                  | (<1%)         |
|                       | Building  | 76           | (5%)          | 21                 | (3%)          | 15                 | (3%)          | 61               | (5%)          | 17                 | (3%)          | 12                 | (3%)          |
|                       | Start-up  | 62           | (4%)          | 27                 | (4%)          | 24                 | (4%)          | 50               | (4%)          | 22                 | (4%)          | 19                 | (4%)          |
| <b>Fixed Total</b>    |           | <b>1400</b>  | <b>(89%)</b>  | <b>454</b>         | <b>(71%)</b>  | <b>391</b>         | <b>(68%)</b>  | <b>1095</b>      | <b>(88%)</b>  | <b>361</b>         | <b>(70%)</b>  | <b>308</b>         | <b>(66%)</b>  |
| <b>Total</b>          |           | <b>1565</b>  | <b>(100%)</b> | <b>637</b>         | <b>(100%)</b> | <b>574</b>         | <b>(100%)</b> | <b>1243</b>      | <b>(100%)</b> | <b>516</b>         | <b>(100%)</b> | <b>464</b>         | <b>(100%)</b> |

\*Drug costs include ART (\$114/year in South Africa, \$102 in Uganda) and co-trimoxazole (\$4/year in South Africa, \$8/year in Uganda)

**Table S12: Annual cost per client in steady-state (programmatic) scenario (2018 USD)**

|                       |           | First Year   |               |                    |               |                    |               | Subsequent Years |               |                    |               |                    |               |
|-----------------------|-----------|--------------|---------------|--------------------|---------------|--------------------|---------------|------------------|---------------|--------------------|---------------|--------------------|---------------|
|                       |           | SW<br>Uganda |               | Midlands<br>KZN SA |               | Northern<br>KZN SA |               | SW<br>Uganda     |               | Midlands<br>KZN SA |               | Northern<br>KZN SA |               |
|                       |           | Cost         | (%)           | Cost               | (%)           | Cost               | (%)           | Cost             | (%)           | Cost               | (%)           | Cost               | (%)           |
| Variable              | Drugs*    | 110          | (20%)         | 118                | (23%)         | 118                | (27%)         | 110              | (25%)         | 118                | (28%)         | 118                | (33%)         |
|                       | Labs      | 36           | (6%)          | 60                 | (11%)         | 60                 | (13%)         | 22               | (5%)          | 34                 | (8%)          | 34                 | (9%)          |
|                       | Fuel      | 17           | (3%)          | 4                  | (1%)          | 4                  | (1%)          | 13               | (3%)          | 3                  | (1%)          | 3                  | (1%)          |
|                       | Other     | 2            | (<1%)         | 1                  | (<1%)         | 1                  | (<1%)         | 2                | (<1%)         | 1                  | (<1%)         | 1                  | (<1%)         |
| <b>Variable Total</b> |           | <b>165</b>   | <b>(30%)</b>  | <b>183</b>         | <b>(35%)</b>  | <b>183</b>         | <b>(41%)</b>  | <b>148</b>       | <b>(34%)</b>  | <b>157</b>         | <b>(37%)</b>  | <b>157</b>         | <b>(43%)</b>  |
| Fixed                 | Personnel | 176          | (32%)         | 262                | (50%)         | 190                | (43%)         | 141              | (32%)         | 210                | (49%)         | 152                | (42%)         |
|                       | Vehicles  | 83           | (15%)         | 24                 | (5%)          | 25                 | (6%)          | 66               | (15%)         | 19                 | (5%)          | 20                 | (5%)          |
|                       | Equipment | 38           | (7%)          | 5                  | (1%)          | 8                  | (2%)          | 5                | (1%)          | 1                  | (<1%)         | 1                  | (<1%)         |
|                       | Building  | 76           | (14%)         | 21                 | (4%)          | 15                 | (3%)          | 61               | (14%)         | 17                 | (4%)          | 12                 | (3%)          |
|                       | Start-up  | 19           | (3%)          | 29                 | (6%)          | 26                 | (6%)          | 15               | (3%)          | 23                 | (5%)          | 20                 | (6%)          |
| <b>Fixed Total</b>    |           | <b>391</b>   | <b>(70%)</b>  | <b>341</b>         | <b>(65%)</b>  | <b>263</b>         | <b>(59%)</b>  | <b>288</b>       | <b>(66%)</b>  | <b>270</b>         | <b>(63%)</b>  | <b>205</b>         | <b>(57%)</b>  |
| <b>Total</b>          |           | <b>555</b>   | <b>(100%)</b> | <b>523</b>         | <b>(100%)</b> | <b>446</b>         | <b>(100%)</b> | <b>435</b>       | <b>(100%)</b> | <b>427</b>         | <b>(100%)</b> | <b>362</b>         | <b>(100%)</b> |

\*Drug costs include ART (\$114/year in South Africa, \$102 in Uganda) and co-trimoxazole (\$4/year in South Africa, \$8/year in Uganda)

**Table S13: Annual cost per client in efficient at-scale scenario (2018 USD)**

|                       |           | First Year |               |                 |               |                 |               | Subsequent Years |               |                 |               |                 |               |
|-----------------------|-----------|------------|---------------|-----------------|---------------|-----------------|---------------|------------------|---------------|-----------------|---------------|-----------------|---------------|
|                       |           | SW Uganda  |               | Midlands KZN SA |               | Northern KZN SA |               | SW Uganda        |               | Midlands KZN SA |               | Northern KZN SA |               |
|                       |           | Cost       | (%)           | Cost            | (%)           | Cost            | (%)           | Cost             | (%)           | Cost            | (%)           | Cost            | (%)           |
| Variable              | Drugs*    | 110        | (51%)         | 118             | (38%)         | 118             | (38%)         | 110              | (59%)         | 118             | (48%)         | 118             | (49%)         |
|                       | Labs      | 36         | (16%)         | 60              | (19%)         | 60              | (19%)         | 22               | (12%)         | 34              | (14%)         | 34              | (14%)         |
|                       | Fuel      | 17         | (8%)          | 4               | (1%)          | 4               | (1%)          | 13               | (7%)          | 3               | (1%)          | 3               | (1%)          |
|                       | Other     | 2          | (<1%)         | 1               | (<1%)         | 1               | (<1%)         | 2                | (1%)          | 1               | (<1%)         | 1               | (1%)          |
| <b>Variable Total</b> |           | <b>165</b> | <b>(76%)</b>  | <b>183</b>      | <b>(59%)</b>  | <b>183</b>      | <b>(59%)</b>  | <b>148</b>       | <b>(79%)</b>  | <b>157</b>      | <b>(64%)</b>  | <b>157</b>      | <b>(64%)</b>  |
| Fixed                 | Personnel | 23         | (11%)         | 99              | (32%)         | 90              | (29%)         | 19               | (10%)         | 69              | (28%)         | 64              | (26%)         |
|                       | Vehicles  | 11         | (5%)          | 9               | (3%)          | 12              | (4%)          | 9                | (5%)          | 6               | (3%)          | 8               | (3%)          |
|                       | Equipment | 5          | (2%)          | 2               | (1%)          | 4               | (1%)          | 1                | (<1%)         | <1              | (<1%)         | <1              | (<1%)         |
|                       | Building  | 10         | (5%)          | 8               | (3%)          | 7               | (2%)          | 8                | (4%)          | 6               | (2%)          | 5               | (2%)          |
|                       | Start-up  | 3          | (1%)          | 11              | (3%)          | 12              | (4%)          | 2                | (1%)          | 8               | (3%)          | 9               | (4%)          |
| <b>Fixed Total</b>    |           | <b>52</b>  | <b>(24%)</b>  | <b>129</b>      | <b>(41%)</b>  | <b>125</b>      | <b>(41%)</b>  | <b>40</b>        | <b>(21%)</b>  | <b>89</b>       | <b>(36%)</b>  | <b>87</b>       | <b>(36%)</b>  |
| <b>Total</b>          |           | <b>217</b> | <b>(100%)</b> | <b>312</b>      | <b>(100%)</b> | <b>308</b>      | <b>(100%)</b> | <b>187</b>       | <b>(100%)</b> | <b>246</b>      | <b>(100%)</b> | <b>244</b>      | <b>(100%)</b> |

\*Drug costs include ART (\$114/year in South Africa, \$102 in Uganda) and co-trimoxazole (\$4/year in South Africa, \$8/year in Uganda)

**Table S14: Estimated annual costs per client and per client virally suppressed under community-based ART delivery (2018 USD)**

| Scenario                                         |                             | First Year |                 |                 | Subsequent Years |                 |                 |
|--------------------------------------------------|-----------------------------|------------|-----------------|-----------------|------------------|-----------------|-----------------|
|                                                  |                             | SW Uganda  | Midlands KZN SA | Northern KZN SA | SW Uganda        | Midlands KZN SA | Northern KZN SA |
| <b>Annual cost per client</b>                    | Steady-state (as observed)  | 1565       | 637             | 574             | 1243             | 516             | 464             |
|                                                  | Steady-state (programmatic) | 555        | 523             | 446             | 435              | 427             | 362             |
|                                                  | Efficient at-scale          | 217        | 312             | 308             | 187              | 246             | 244             |
| <b>Annual cost per client virally suppressed</b> | Steady-state (as observed)  | 1981       | 923             | 709             | 1702             | 820             | 618             |
|                                                  | Steady-state (programmatic) | 703        | 759             | 551             | 596              | 678             | 483             |
|                                                  | Efficient at-scale          | 274        | 452             | 380             | 257              | 390             | 325             |

We did not measure costs incurred among clients receiving clinic-based care. Instead, we estimated the cost per client virally suppressed by combining viral suppression rates in the clinic-based arm with recently published cost estimates for annual adult ART costs in South Africa.<sup>6</sup> We compared these to the estimates from the efficient scenario using first-year ART costs (Table S14).

**Table S15: Comparison of estimated community-based (efficient at-scale scenario) vs. facility-based annual cost per client virally suppressed in South Africa and Uganda**

|                                           | SW Uganda            |           | Midlands KZN SA    |                    | Northern KZN SA    |                    |
|-------------------------------------------|----------------------|-----------|--------------------|--------------------|--------------------|--------------------|
|                                           | Facility             | Community | Facility           | Community          | Facility           | Community          |
| Annual cost per client                    | \$163 <sup>**6</sup> | \$217     | \$249 <sup>7</sup> | \$312 <sup>*</sup> | \$249 <sup>7</sup> | \$308 <sup>*</sup> |
| % virally suppressed                      | 76%                  | 79%       | 59%                | 69%                | 62%                | 81%                |
| Annual cost per client virally suppressed | \$214                | \$275     | \$422              | \$452              | \$402              | \$380              |

<sup>\*</sup>Cost under efficient at-scale scenario

<sup>\*\*</sup>Cost under maximally streamlined scenario (scenario C)<sup>6</sup>

## Limitations

The analyses described above have several limitations. First, the cost estimates beyond the first year are projected based on what was observed during the first year and could change. Costs could decrease if visit durations shorten over time, which may occur as clients become more familiar with ART; alternatively, factors such as resistance and dropout could increase costs. Second, the cost projections under the efficient at-scale scenarios require sufficient volume of clients. Ministries of Health would need to negotiate with clinical staff to work in a new environment to provide these services. These factors were less important with lower client volumes and research staff in the DO ART Study. The scenario analysis results represent potential feasibility as well as general guidance on the inputs and volumes necessary for community-based delivery costs to be similar to facility-based costs. Implementation studies of community-based ART delivery outside of the setting of randomized trials are needed to better define the feasibility, cost, and scalability of delivery models.

## EVOLVING STANDARD OF CARE

The Kabwohe Clinical Research Centre ART clinic is a private not-for-profit health facility located in southwest Uganda and is supported by the United States Agency for International Development and the Elizabeth Glaser Pediatric AIDS Foundation. The partner clinics in Midlands KZN and Northern KZN, South Africa are provincial health clinics operated by the KwaZulu-Natal Department of Health.

**Table S16. Summary of changes in standard of care by site**

| Practice                               | SW Uganda    |                                                                                                                                                                                                                                                                                                                                                            | Midlands KZN SA |                                                                                                                                                                                                       | Northern KZN SA |                                                                                                                                                                                                                                                       |
|----------------------------------------|--------------|------------------------------------------------------------------------------------------------------------------------------------------------------------------------------------------------------------------------------------------------------------------------------------------------------------------------------------------------------------|-----------------|-------------------------------------------------------------------------------------------------------------------------------------------------------------------------------------------------------|-----------------|-------------------------------------------------------------------------------------------------------------------------------------------------------------------------------------------------------------------------------------------------------|
|                                        | Date started | Description                                                                                                                                                                                                                                                                                                                                                | Date started    | Description                                                                                                                                                                                           | Date started    | Description                                                                                                                                                                                                                                           |
| Treat at any CD4                       | Dec-2016     | National guidelines changed to treat at any CD4 count.                                                                                                                                                                                                                                                                                                     | Pre-DO ART      | National guidelines changed to treat at any CD4 count.                                                                                                                                                | Pre-DO ART      | National guidelines changed to treat at any CD4 count.                                                                                                                                                                                                |
| Same day ART initiation                | Dec-2016     | With the removal of the CD4 criteria for ART start, the clinic stopped requiring multiple pre-ART visits. The client is assessed for readiness to start ART (same-day CD4 and OI assessment). Initial dispensation of ART is 15 days.                                                                                                                      | Sep-2017        | Department of Health guidelines change, all clinics are obliged to follow "same-day test and treat" policy. Baseline labs are collected the same day a client tests positive.                         | Sep-2017        | Department of Health guidelines change, all clinics are obliged to follow "same-day test and treat" policy. Baseline labs are collected the same day a client tests positive.                                                                         |
| Alternative options for ART dispensing | Jun-2017     | Once clients have one suppressed viral load (at 6 months post ART start), they are given the option to either be put into a group with 3 others all from the same location, rotating picking up ART, or dispensed at the pharmacy with 6 months refill (half dispensed immediately and half dispensed three months later without requiring a nurse visit). | Jul-2017        | Medically stable clients are put onto the Medipost program. Clients in this program go straight to the Medipost section of the clinic and pick up their medication, which only takes 5 to 15 minutes. | 2017            | Once clients have a suppressed viral load (at 12 months post ART start), they can transition into CCMDD which allows for monthly ART pick-up at the in-clinic pharmacy, without having to see a care provider. Clients see a provider every 6 months. |

**Table S17. Standard of care description at Kabwohe Clinical Research Centre (SW Uganda)**

| Practice                           | Date Started | Description                                                                                                                                                                                                                                                                                                                                                  | Date Modified | Reason for Change                                    |
|------------------------------------|--------------|--------------------------------------------------------------------------------------------------------------------------------------------------------------------------------------------------------------------------------------------------------------------------------------------------------------------------------------------------------------|---------------|------------------------------------------------------|
| Pre-ART visits                     | Pre-DO ART   | Multiple visits were required prior to ART start, to assess eligibility and willingness.                                                                                                                                                                                                                                                                     | Dec-2016      | CD4 guidelines change and roll-out of same day start |
| Intensive adherence counselling    | Pre-DO ART   | Individuals with unsuppressed viral loads are contacted to return to the clinic for intensive adherence counselling.                                                                                                                                                                                                                                         | Continuing    | N/A                                                  |
| Treat at any CD4                   | Dec-2016     | National guidelines changed to treat at any CD4 count.                                                                                                                                                                                                                                                                                                       | Continuing    | N/A                                                  |
| Same day ART initiation            | Dec-2016     | With the removal of the CD4 criteria for ART start, the clinic stopped requiring multiple pre-ART visits. The patient is assessed for readiness to start ART (same-day CD4 and OI assessment). Initial dispensation of ART is 15 days.                                                                                                                       | Continuing    | N/A                                                  |
| ART clubs (clusters)               | Jun-2017     | Once clients have one suppressed viral load (at six months post ART start), they are given the option to either be put into a group with 3 others all from the same location, rotating picking up ART, or dispensed at the pharmacy with 6 months refill (half dispensed immediately and half dispensed three months later without requiring a nurse visit). | Continuing    | N/A                                                  |
| Family tracking tools              | Aug-2017     | Once an HIV-positive client initiates care at the clinic, a family tracking tool is also filled to capture all family members. This helps the clinic encourage the patient to bring all other family members for HIV testing services and contributes to early identification of cases.                                                                      | Continuing    | N/A                                                  |
| Discordant couples meetings        | Sep-2017     | Discordant couples are clearly identified and given same-day appointments where they meet as a group and are counselled on prevention and adherence, share challenges and successes on disclosure, in addition to other positive living practices.                                                                                                           | Continuing    | N/A                                                  |
| Viral load testing visit reminders | Oct-2017     | Clients who are due for viral load testing are reminded the day before their appointment to ensure no missed visits.                                                                                                                                                                                                                                         | Continuing    | N/A                                                  |

**Table S18. Standard of care description at Caluza, Mpumuza, and Pata clinics (Midlands KZN SA)**

| Practice                | Date Started | Description                                                                                                                                                                                               | Date Modified | Reason for Change |
|-------------------------|--------------|-----------------------------------------------------------------------------------------------------------------------------------------------------------------------------------------------------------|---------------|-------------------|
| Treat at any CD4        | Pre-DO ART   | National guidelines changed to treat at any CD4 count.                                                                                                                                                    | Continuing    | N/A               |
| ART clubs               | Pre-DO ART   | Community-based ART clubs. Each club is run slightly differently depending upon clinic.                                                                                                                   | Continuing    | N/A               |
| Doctor review           | Pre-DO ART   | ART patients are only reviewed by the doctor if there are complications, otherwise are seen by a nurse.                                                                                                   | Continuing    | N/A               |
| Fast track at clinic    | Jul-2017     | Medically stable clients are all put onto the Medipost program. Clients in this program go straight to the Medipost section of the clinic and pick up their medication, which only takes 5 to 15 minutes. | Continuing    | N/A               |
| Same day ART initiation | Sep-2017     | Department of Health guidelines change, all clinics are obliged to follow "same-day test and treat" policy. Baseline labs are collected the same day a client tests positive.                             | Continuing    | N/A               |

**Table S19. Standard of care description at Ashdown clinic (Midlands KZN SA)**

| Practice             | Date Started | Description                                                                                                                                                                                           | Date Modified | Reason for Change                         |
|----------------------|--------------|-------------------------------------------------------------------------------------------------------------------------------------------------------------------------------------------------------|---------------|-------------------------------------------|
| Treat at any CD4     | Pre-DO ART   | National guidelines changed to treat at any CD4 count.                                                                                                                                                | Continuing    | N/A                                       |
| ART clubs            | Jan-2015     | There is one community-based ART club that is run by a facilitator and caregivers. Clients can pick up their refills during fast track hours (8-10 am) and skip lines.                                | Continuing    | N/A                                       |
| Doctor review        | Pre-DO ART   | ART patients are only reviewed by the doctor if there are complications.                                                                                                                              | Continuing    | N/A                                       |
| Fast track at clinic | Jul-2017     | Medically stable clients are put onto the Medipost program. Clients in this program go straight to the Medipost section of the clinic and pick up their medication, which only takes 5 to 15 minutes. | Oct-17        | 4-month trial, demand was not high enough |
| Same day ART Start   | Dec-2017     | Department of Health guideline change, all clinics are obliged to follow "same-day test and treat" policy. Baseline labs are collected the same day a client tests positive.                          | Continuing    | N/A                                       |

**Table S20. Standard of care description at Nkundusi, Madwaleni, Ntondweni, and Zwenelisha clinics (Northern KZN SA)**

| Practice             | Date Started | Description                                                                                                                                                                  | Date Modified | Reason for Change |
|----------------------|--------------|------------------------------------------------------------------------------------------------------------------------------------------------------------------------------|---------------|-------------------|
| Treat at any CD4     | Pre-DO ART   | National guidelines changed to treat at any CD4 count.                                                                                                                       | Continuing    | N/A               |
| Fast Track at Clinic | Pre-DO ART   | Clients who are current students, geriatric, or very ill can go to the front of the line and be served first                                                                 | Continuing    | N/A               |
| Same day ART Start   | Sep-2017     | Department of Health guideline change, all clinics are obliged to follow "same-day test and treat" policy. Baseline labs are collected the same day a client tests positive. | Continuing    | N/A               |
| CCMDD                | 2017         | All clients virally suppressed at 12 months move into CCMDD. CCMDD pickup only available in clinic.                                                                          | Continuing    | N/A               |

**Table S21. Standard of care description at Siphu Zungu clinic (Northern KZN SA)**

| Practice           | Date Started | Description                                                                                                                                                                       | Date Modified | Reason for Change |
|--------------------|--------------|-----------------------------------------------------------------------------------------------------------------------------------------------------------------------------------|---------------|-------------------|
| Treat at any CD4   | Pre-DO ART   | National guidelines changed to treat at any CD4 count.                                                                                                                            | Continuing    | N/A               |
| Same day ART Start | Sep-2017     | As per new Department of Health guidelines, all clinics are obliged to follow "same-day test and treat" policy. Baseline labs are collected the same day a client tests positive. | Continuing    | N/A               |
| CCMDD              | 2017         | All clients virally suppressed at 12 months move into CCMDD, CCMDD pickup only available in clinic.                                                                               | Continuing    | N/A               |



## REFERENCES

1. Clinton Health Access Initiative. The State of the Antiretroviral Drug Market in Low- and Middle-Income Countries, 2015-2020., 2016.
2. South Africa Department of Health. Medicine Procurement List. 2017.
3. Management Sciences for Health. International Medical Products Price Guide, 2015.
4. Uganda Ministry of Public Health. Salary Structure for Medical Workers.
5. Department of Public Service and Administration RoSA. Salary scales, with translation keys, for employees on salary levels 1 to 12 and those employees covered by Occupation Specific Dispensations (OSDs). 2016.
6. Shade SB, Osmand T, Luo A, et al. Costs of streamlined HIV care delivery in rural Ugandan and Kenyan clinics in the SEARCH Studys. *Aids* 2018; **32**(15): 2179-88.
7. Meyer-Rath G, van Rensburg C, Chiu C, Leuner R, Jamieson L, Cohen S. The per-patient costs of HIV services in South Africa: Systematic review and application in the South African HIV Investment Case. *PloS one* 2019; **14**(2): e0210497.
